# Supplementary material for: Gene Expression Profiles of Beta-Cell Enriched Tissue Obtained by Laser Capture Microdissection from Subjects with Type 2 Diabetes
Source: PLoS One. 2010 Jul 13;5(7):e11499. doi: 10.1371/journal.pone.0011499 (PMC2903480; doi:10.1371/journal.pone.0011499)
Supplement: Table S2 — Gene expression of hormones, receptors, transcription factors, and molecules involved in exocytosis, cell cycle, WNT and Notch signaling, TGF-beta signaling and tumor suppression. (0.15 MB DOC) [file pone.0011499.s002.doc]

**Table S2. Gene expression of hormones, receptors, transcription factors, and molecules involved in exocytosis, cell cycle, WNT and Notch signaling, TGF-beta signaling and tumor suppression.**

| Probe ID | Gene symbol | Ctrl | T2D | LCB | p value |
| --- | --- | --- | --- | --- | --- |
| **Islet hormones and receptors** | | | | | |
| g4557670_3p_at | INS | 5182  246 | 5570  373 | 0.9 | 0.398 |
| **g4557654_3p_at** | **IAPP** | **8919  586** | **6358  768** | **-1.1** | **0.017** |
| g4503944_3p_at | GCG | 9792  53 | 9652  61 | -1.0 | 0.101 |
| Hs.12409.0.S1_3p_at | SST | 5231  66 | 5559  177 | 1.0 | 0.110 |
| g190301_3p_at | PPY | 48  6 | 49  5 | 0.8 | 0.977 |
| g439689_3p_at | GCGR | 211  8 | 207  9 | -0.9 | 0.721 |
| g405081_3p_a_at | GLP1R | 57  2 | 63  4 | 1.0 | 0.208 |
| g4503998_3p_at | GIPR | 5  0 | 4  1 | -0.9 | 0.239 |
| **Islet transcription factors** | | | | | |
| **g7019436_3p_at** | **PDX1** | **27  3** | **42  3** | **1.3** | **0.002** |
| g4505400_3p_at | NKX2-2 | 787  85 | 590  56 | -1.1 | 0.072 |
| g5453787_3p_at | NKX6-1 | 9  1 | 10  2 | 0.7 | 0.854 |
| g4505376_3p_at | NEUROD1 | 1923  102 | 1846  123 | -0.9 | 0.640 |
| g5453849_3p_at | PAX4 | 17  3 | 22  3 | 0.9 | 0.245 |
| **g4505614_3p_s_at** | **PAX6** | **2384  149** | **3302  239** | **1.2** | **0.005** |
| **g184264_3p_at** | **HNF1A** | **104  4** | **82  5** | **-1.1** | **0.002** |
| Hs.54424.3.S1_3p_a_at | HNF4A | 43  2 | 44  3 | 0.9 | 0.755 |
| g10337610_3p_at | NEUROG3 | 7  1 | 7  1 | -0.7 | 0.696 |
| **Hs.103538.0.S1_3p_at** | **ARX** | **634  40** | **833  65** | **1.1** | **0.019** |
| g4885446_3p_a_at | MAFB | 2475  194 | 2280  199 | -0.9 | 0.491 |
| **Exocytosis** | | | | | |
| g4759181_3p_a_at | STX1A | 2358  236 | 1974  162 | -1.0 | 0.199 |
| **g4507098_3p_a_at** | **SNAP25** | **3382  277** | **2678  144** | **-1.1** | **0.041** |
| g4507296_3p_a_at | STXBP1 | 2762  100 | 2698  77 | -1.0 | 0.618 |
| **Hs.23179.0.A1_3p_a_at** | **SYT5** | **23  1** | **30  2** | **1.1** | **0.006** |
| Hs.75667.0.S1_3p_at | SYP | 587  102 | 560  49 | -0.7 | 0.811 |
| Hs.20021.1.S1_3p_at | VAMP1 | 125  4 | 138  7 | 1.0 | 0.145 |
| Hs.194534.1.A1_3p_a_at | VAMP2 | 556  43 | 517  23 | -0.9 | 0.430 |
| g13097737_3p_at | VAMP3 | 1454  54 | 1430  49 | -0.9 | 0.742 |
| **g5454147_3p_at** | **UNC13B** | **523  29** | **348  19** | **-1.3** | **0.000** |
| Hs.8059.0.S2_3p_at | SYT4 | 2694  70 | 2753  85 | 1.0 | 0.596 |
| g11079227_3p_at | NSF | 1598  69 | 1430  40 | -1.0 | 0.053 |
| g12654654_3p_a_at | NAPA | 1088  75 | 1154  62 | 0.9 | 0.510 |
| **Cell cycle genes** | | | | | |
| g4502616_3p_a_at | CCND2 | 1706  82 | 1792  92 | 0.9 | 0.492 |
| g4502618_3p_at | CCND3 | 2079  176 | 2213  219 | 0.9 | 0.640 |
| g4502734_3p_s_at | CDK4 | 218  12 | 238  27 | 0.9 | 0.522 |
| Hs.180059.0.S3_3p_at | CDK6 | 346  37 | 351  25 | 0.8 | 0.907 |
| **g180177_3p_at** | **CDK2** | **24  2** | **31  2** | **1.1** | **0.018** |
| g4502748_3p_at | p16 (INK4a) | 317  32 | 426  44 | 1.1 | 0.060 |
| **g11386202_3p_a_at** | **p21 (Cip1)** | **2011  232** | **2622  122** | **1.1** | **0.035** |
| g4506434_3p_at | RB1 | 241  16 | 241  25 | 0.8 | 0.990 |
| **Hs2.87.2.S1_3p_s_at** | **RBL1** | **42  3** | **32  3** | **-1.1** | **0.026** |
| Hs.79362.0.S3_3p_at | RBL2 | 1283  60 | 1309  55 | 0.9 | 0.746 |
| **g7705484_3p_a_at** | **CDK5RAP1** | **371  22** | **524  38** | **1.2** | **0.003** |
| **Hs.32360.2.S1_3p_a_at** | **CDK5RAP2** | **626  44** | **818  38** | **1.1** | **0.004** |
| **g13376787_3p_a_at** | **CDK5RAP3** | **1141  66** | **1400  68** | **1.1** | **0.014** |
| g4758323_3p_a_at | EZH2 | 36  3 | 40  3 | 0.9 | 0.299 |
| Hs2.407338.1.S1_3p_s_at | MLL | 24  2 | 25  2 | 0.9 | 0.797 |
| g4506038_3p_a_at | PRC1 | 112  4 | 101  6 | -1.0 | 0.165 |
| Hs.103915.0.S1_3p_at | JMJD3 | 38  2 | 37  2 | -0.9 | 0.863 |
| g4885094_3p_at | BMI1 | 2368  52 | 2247  96 | -1.0 | 0.286 |
| **WNT signaling pathway** | | | | | |
| g4885654_3p_at | WNT1 | 17  1 | 17  2 | 0.8 | 0.878 |
| g4507926_3p_at | WNT2 | 52  2 | 55  4 | 0.9 | 0.547 |
| **4809630C_3p_s_at** | **WNT6** | **60  4** | **22  4** | **-2.1** | **0.000** |
| **4851107C_3p_at** | **DVL2** | **517  30** | **650  49** | **1.1** | **0.035** |
| **Hs.278503.1.A1_3p_s_at** | **DKK3** | **807  138** | **2283  340** | **1.9** | **0.002** |
| **g7657024_3p_at** | **DKK4** | **123  3** | **134  3** | **1.0** | **0.010** |
| **Hs.70823.0.S3_3p_at** | **SULF1** | **75  17** | **135  13** | **1.3** | **0.012** |
| **g6912383_3p_at** | **FZD4** | **254  14** | **174  18** | **-1.2** | **0.003** |
| **Hs.31386.0.S1_3p_a_at** | **SFRP2** | **104  4** | **135  9** | **1.1** | **0.008** |
| **g8400734_3p_a_at** | **SFRP5** | **51  7** | **111  20** | **1.5** | **0.015** |
| Hs.173638.0.S3_3p_at | TCF7L2 | 1111  72 | 1112  77 | 0.9 | 0.995 |
| 221021_3p_s_at | CTNNBL1 | 132  10 | 138  11 | 0.9 | 0.690 |
| **Notch signaling pathway** | | | | | |
| g8923012_3p_at | NOTCH1 | 95  4 | 96  12 | 0.8 | 0.937 |
| g11275977_3p_a_at | NOTCH2 | 20  2 | 17  1 | -1.0 | 0.070 |
| g4557798_3p_a_at | NOTCH3 | 203  20 | 242  30 | 0.9 | 0.291 |
| **Hs.323231.0.S1_3p_at** | **NOTCH2NL** | **241  29** | **436  57** | **1.3** | **0.009** |
| g6180181_3p_a_at | DLL1 | 120  17 | 131  17 | 0.8 | 0.663 |
| Hs.127792.0.A1_3p_a_at | DLL3 | 40  2 | 44  2 | 1.0 | 0.214 |
| g10567109_3p_at | DLL4 | 63  2 | 67  3 | 1.0 | 0.241 |
| g562105_3p_a_at | DLK1 | 8724  291 | 8600  385 | -0.9 | 0.800 |
| g1695273_3p_a_at | JAG1 | 56  2 | 61  6 | 0.9 | 0.439 |
| **g2605944_3p_s_at** | **JAG2** | **110  3** | **127  5** | **1.1** | **0.015** |
| g8400709_3p_a_at | HES1 | 79  9 | 121  23 | 1.0 | 0.115 |
| g7549812_3p_a_at | PSEN1 | 355  16 | 418  39 | 1.0 | 0.164 |
| g1079575_3p_s_at | PSEN2 | 1694  60 | 1657  88 | -0.9 | 0.732 |
| g4505158_3p_a_at | MFNG | 15  1 | 16  2 | 0.8 | 0.679 |
| **TGF-beta signaling** | | | | | |
| **Hs.211578.0.S3_3p_at** | **SMAD3** | **104  3** | **88  3** | **-1.1** | **0.001** |
| **Hs.165210.0.A1_3p_at** | **SMAD5** | **83  8** | **54  4** | **-1.3** | **0.006** |
| g5902814_3p_a_at | BMP1 | 19  1 | 18  1 | -0.8 | 0.990 |
| **g5902809_3p_at** | **BMP1** | **63  3** | **84  5** | **1.2** | **0.001** |
| g10835090_3p_a_at | BMP5 | 429  27 | 715  129 | 1.2 | 0.056 |
| **g4758051_3p_at** | **CRABP1** | **36  2** | **27  2** | **-1.1** | **0.005** |
| **g4759283_3p_s_at** | **UCHL1** | **4215  57** | **3903  104** | **-1.0** | **0.020** |
| **g5174740_3p_at** | **UCHL3** | **865  40** | **745  37** | **-1.0** | **0.041** |
| **g6912533_3p_at** | **BAMBI** | **169  22** | **274  36** | **1.2** | **0.025** |
| **g13477368_3p_at** | **INHBE** | **14  5** | **48  11** | **1.8** | **0.014** |
| **Hs.92614.1.S1_3p_at** | **LASS1** | **231  28** | **377  33** | **1.3** | **0.003** |
| **g4557544_3p_a_at** | **EDN3** | **3999  291** | **1914  275** | **-1.6** | **0.000** |
| g4557546_3p_at | EDNRB | 64  7 | 55  6 | -0.9 | 0.342 |
| **Hs.37054.0.S2_3p_at** | **EFNA3** | **93  11** | **181  20** | **1.5** | **0.002** |
| **Tumor suppressor genes** | | | | | |
| g4506434_3p_at | RB1 | 241  16 | 241  25 | 0.8 | 0.990 |
| g8400737_3p_at | TP53 | 34  6 | 41  5 | 0.9 | 0.341 |
| g4506248_3p_at | PTEN | 136  12 | 123  10 | -0.9 | 0.441 |
| Hs.75081.0.S2_3p_a_at | APC | 137  15 | 116  10 | -0.9 | 0.248 |
| g7019352_3p_at | MED23 | 295  26 | 318  29 | 0.9 | 0.556 |
| g4758795_3p_at | DRG1 | 1240  49 | 1190  44 | -1.0 | 0.459 |
| g4757943_3p_at | CD81 | 7791  174 | 7549  141 | -1.0 | 0.293 |
| g4557796_3p_at | NME1 | 297  24 | 365  54 | 0.9 | 0.279 |
| g4505408_3p_s_at | NME2 | 2614  107 | 2806  171 | 1.0 | 0.358 |
| Hs.6441.0.A1_3p_a_at | TIMP2 | 586  35 | 633  41 | 0.9 | 0.391 |
| g6552300_3p_a_at | BRCA1 | 228  40 | 219  49 | -0.7 | 0.881 |

Data are expressed as mean  SE (standard error of the mean) of transcript array signals of control samples and samples from type 2 diabetic subjects. Differentially expressed genes as for the lower confidence bound (LCB) (1.2) and/or the p value (p < 0.05) are in bold. Ctrl: Control subjects; T2D: Type 2 diabetic subjects.
